# Supplementary material for: Relationship between asparagine metabolism and protein concentration in soybean seed
Source: PubMed Central journal article supplement — J Exp Bot. 2012 Feb 22;63(8):3173–84. doi: 10.1093/jxb/ers039 (PMC3350928; doi:10.1093/jxb/ers039), 2012-02-22
Supplement: supp_ers039_00074633-file001.pdf [file supp_ers039_00074633-file001.pdf]

**Relationship between asparagine metabolism and protein concentration in soybean seed**

Sudhakar Pandurangan, Agnieszka Pajak, Stephen J. Molnar, Elroy R. Cober, Sangeeta Dhaubhadel, Cinta Hernández-Sebastià, Werner M. Kaiser, Randall L. Nelson, Steven C. Huber, Frédéric Marsolais

**Table S1.** Temperature cycle used for growth in growth cabinets.

| <b>Time</b> | <b>Temperature (°C)</b> | <b>Fluorescent tubes (No.)</b> | <b>Incandescent bulbs (No.)</b> |
|-------------|-------------------------|--------------------------------|---------------------------------|
| 0:00        | 18                      | 0                              | 0                               |
| 6:00        | 20                      | 3                              | 3                               |
| 8:00        | 22                      | 3                              | 3                               |
| 10:00       | 23                      | 3                              | 3                               |
| 12:00       | 24                      | 3                              | 3                               |
| 14:00       | 23                      | 3                              | 3                               |
| 18:00       | 22                      | 3                              | 3                               |
| 22:00       | 20                      | 0                              | 0                               |
